# Supplementary material for: Comparison between intrathecal morphine and intravenous patient control analgesia for pain control after video-assisted thoracoscopic surgery: A pilot randomized controlled study
Source: PLoS One. 2022 Apr 6;17(4):e0266324. doi: 10.1371/journal.pone.0266324 (PMC8985927; doi:10.1371/journal.pone.0266324)
Supplement: S1 Dataset — (XLSX) [file pone.0266324.s001.xlsx]

## Sheet: Sheet1
id	ITM	Age	BMI	ASA	Underlyingdiseases	DM	HT	DLP	Diagnosis	Operation	pain01	SE01_NV	SE01_Puritis	SE01_Sedataion	pain06	SE06_NV	SE06_Puritis	SE06_Sedataion	pain12	SE12_NV	SE12_Puritis	SE12_Sedataion	pain24	SE24_NV	SE24_Puritis	SE24_Sedataion	pain48	SE48_NV	SE48_Puritis	SE48_Sedataion	SAF48_score	MO_firstathr	MO_totaldose	havingpur01	havingpur06	havingpur12	havingpur24	havingpur48	havingseda01	havingseda06	havingseda12	havingseda24	havingseda48	havingnv01	havingnv06	havingnv12	havingnv24	havingnv48	overalnv
1	0	69	31.3	3	HT, DLP, Asthma, Obesity	0	1	1	CA lung	VATs with RUL lobectomy	10	0	0	2	9	0	0	1	3	0	0	1	4	0	0	1	7	0	2	1	4	1	23	0	0	0	0	1	1	0	0	0	0	0	0	0	0	0	0
2	0	69	19.2	2	HT	0	1	0	LLL nodule	VATs with LLL lobectomy	9	0	0	2	5	0	0	2	2	0	0	2	4	2	0	1	2	0	0	1	5	1	17	0	0	0	0	0	1	1	1	0	0	0	0	0	1	0	1
3	0	51	19.7	2	C-spondylosis, Migraine	0	0	0	RLL mass	VATs with RLL lobectomy	8	2	0	2	8	1	0	2	5	1	0	2	4	1	1	1	2	0	0	1	5	1	41	0	0	0	1	0	1	1	1	0	0	1	1	1	1	0	1
4	0	61	23.9	3	HT, CA cervix	0	1	0	RLL nodule	VATs with wedge resection	6	0	0	2	5	0	0	1	3	1	0	1	3	1	0	1	2	1	0	1	5	2	28	0	0	0	0	0	1	0	0	0	0	0	0	1	1	1	1
5	0	37	24.3	3	Allergic rhinitis, Grave disease	0	0	0	Generalized myasthenia gravis	VATs thymectomy	10	0	0	2	7	0	0	2	5	0	0	1	2	0	0	1	2	0	0	1	5	1	17	0	0	0	0	0	1	1	0	0	0	0	0	0	0	0	0
6	0	29	23.3	1		0	0	0	LLL mass	VATs LLL lobectomy	8	0	0	2	6	2	0	1	1	2	0	1	3	1	1	1	5	0	0	1	3	4	4	0	0	0	1	0	1	0	0	0	0	0	1	1	1	0	1
7	0	31	19.7	1		0	0	0	Spontaneous Lt. pneumothorax	VATs with Lt. lung bullectomy	5	0	0	2	3	0	0	2	1	0	0	1	1	0	0	1	0	0	0	1	5	1	36	0	0	0	0	0	1	1	0	0	0	0	0	0	0	0	0
8	0	59	21.3	1		0	0	0	RLL nodule	VTAs with wedge resection	10	0	0	2	8	2	0	1	7	2	0	1	6	2	0	1	4	1	0	1	4	1	9	0	0	0	0	0	1	0	0	0	0	0	1	1	1	1	1
9	0	50	25.1	1		0	0	0	Anterior mediastinal mass	VATs with thymectomy	7	0	0	2	5	0	0	1	4	2	0	1	4	0	0	1	3	0	0	1	4	1	22	0	0	0	0	0	1	0	0	0	0	0	0	1	0	0	1
10	0	18	17.3	2	Active smoker	0	0	0	Spontaneous Lt. pneumothorax	VATs with Lt. lung bullectomy	9	0	0	2	7	0	0	1	8	0	0	1	7	0	0	1	6	0	0	1	4	1	63	0	0	0	0	0	1	0	0	0	0	0	0	0	0	0	0
11	0	58	21.6	2	Mild anemia	0	0	0	Bilateral pneumothorax	VATs with Rt. bullectomy	8	0	0	2	7	0	0	1	8	0	0	1	8	2	0	1	6	0	0	1	5	2	15	0	0	0	0	0	1	0	0	0	0	0	0	0	1	0	1
12	0	64	19.5	2	C-spondylosis	0	0	0	RUL nodule	VATs with lobectomy	9	0	0	2	8	0	0	2	6	0	0	1	5	2	0	1	5	1	0	1	3	1	19	0	0	0	0	0	1	1	0	0	0	0	0	0	1	1	1
13	0	39	21	2	on Rt.ICD	0	0	0	Spontaneous Rt. pneumothorax	VATs with blebectomy	7	0	0	2	5	0	0	1	5	1	0	1	5	1	0	1	2	1	0	1	4	1	56	0	0	0	0	0	1	0	0	0	0	0	0	1	1	1	1
14	0	27	20.6	2	Anemia, Ewing's sarcoma Lt. hip	0	0	0	Lt. lung metastasis	VATs with Lt. lung mass excision	9	0	0	2	7	1	0	1	4	2	0	1	5	2	0	1	5	2	0	1	1	1	28	0	0	0	0	0	1	0	0	0	0	0	1	1	1	1	1
15	0	57	21.3	2	BPH	0	0	0	Lt. Hilar node	VATs with excision hilar node	8	0	0	2	5	1	0	1	5	0	0	1	3	0	0	1	3	0	0	1	5	1	8	0	0	0	0	0	1	0	0	0	0	0	1	0	0	0	1
16	0	51	19.8	2	DLP	0	0	1	RML and RUL nodule	VATs with wedge resection	6	0	0	2	5	2	0	1	4	2	0	1	3	1	0	1	3	0	0	1	4	1	19	0	0	0	0	0	1	0	0	0	0	0	1	1	1	0	1
17	0	68	19.8	3	HT, DM	1	1	0	CA lung	VATs with LUL lobectomy	6	0	0	2	5	0	0	1	4	0	0	1	4	0	0	1	0	0	0	1	5	4	5	0	0	0	0	0	1	0	0	0	0	0	0	0	0	0	0
18	0	61	21.1	3	OSA	0	0	0	CA lung	VATs with RLL lobectomy	6	0	0	2	2	1	2	1	2	2	0	1	2	1	0	1	2	2	0	1	4	1	28	0	1	0	0	0	1	0	0	0	0	0	1	1	1	1	1
19	0	65	21.9	3	HT, DLP	0	1	1	CA lung	VATs with LUL lobectomy	8	0	0	2	5	1	0	1	6	0	0	1	2	1	0	1	1	2	2	1	5	1	14	0	0	0	0	1	1	0	0	0	0	0	1	0	1	1	1
23	1	66	23.3	3	HT, DM, DLP, CA colon	1	1	1	RUL mass	VATs with RUL lobectomy	0	0	0	1	3	0	0	2	0	0	0	2	3	0	0	1	1	0	0	1	4	3	3	0	0	0	0	0	0	1	1	0	0	0	0	0	0	0	0
24	1	70	22.8	2	DLP	0	0	1	RUL nodule	VATs with wedge resection	9	0	2	2	2	0	1	2	8	2	1	1	4	2	1	1	2	1	0	1	4	1	27	1	1	1	1	0	1	1	0	0	0	0	0	1	1	1	1
25	1	25	16.3	3	R/O Marfan's syndrome	0	0	0	Spontaneous Lt. pneumothorax	VATs with blebectomy	8	0	0	2	7	0	0	1	5	2	0	1	6	1	0	1	3	0	0	1	4	1	43	0	0	0	0	0	1	0	0	0	0	0	0	1	1	0	1
26	1	66	33	3	HT, DM, DLP	1	1	1	LUL nodule	VATs with wedge resection	2	0	0	2	0	2	0	2	0	2	0	1	5	0	0	1	2	0	0	2	5	1	2	0	0	0	0	0	1	1	0	0	1	0	1	1	0	0	1
27	1	42	23.6	2	HT	0	1	0	LLL bleb	VATs with LLL Blebectomy	9	0	0	1	7	0	0	1	7	0	1	1	7	0	2	1	6	0	0	1	5	2	54	0	0	1	1	0	0	0	0	0	0	0	0	0	0	0	0
28	1	22	17.9	2	Ankylosing spondylitis	0	0	0	Spontaneous Rt. pneumothorax	VATs with lung blebectomy	0	1	0	1	0	1	2	1	2	0	2	1	5	0	0	1	2	0	0	1	3	1	20	0	1	1	0	0	0	0	0	0	0	1	1	0	0	0	1
29	1	43	21.4	2	Myasthenia gravis	0	0	0	Thymoma	VATs with thymectomy	7	0	0	2	5	2	1	2	4	2	2	1	2	0	0	1	5	0	0	1	5	1	3	0	1	1	0	0	1	1	0	0	0	0	1	1	0	0	1
30	1	62	22	3	DM, HCV cirrhosis	1	1	0	Anterior mediastinal mass	VATs thymectomy	7	0	0	2	5	0	0	1	3	0	1	1	3	0	1	1	2	0	0	1	4	1	4	0	0	1	1	0	1	0	0	0	0	0	0	0	0	0	0
31	1	68	26.4	3	CA rectum, SVD (S?P PCI), HT	0	1	0	RLL nodule	VATs with RLL lobectomy	7	0	0	2	7	0	1	1	4	1	2	1	5	2	1	1	2	0	0	1	4	1	10	0	1	1	1	0	1	0	0	0	0	0	0	1	1	0	1
32	1	65	19.7	2	DLP	0	0	1	CA lung	VATs LUL lobevtomy	4	0	0	2	2	0	0	2	6	0	1	1	3	0	2	1	3	0	0	1	3	1	15	0	0	1	1	0	1	1	0	0	0	0	0	0	0	0	0
33	1	32	19.3	1		0	0	0	RLL cyst	VATs with RLL lobectomy	7	0	0	2	2	1	0	1	5	2	0	1	3	1	0	1	3	0	0	1	4	1	22	0	0	0	0	0	1	0	0	0	0	0	1	1	1	0	1
34	1	38	24.3	2	Mild anemia	0	0	0	Generalized myasthenia gravis	VATs with thymectomy	1	1	0	2	1	2	2	1	1	1	1	1	0	0	2	1	0	0	0	1	5	0	0	0	1	1	1	0	1	0	0	0	0	1	1	1	0	0	1
35	1	64	19.3	2	HIV infection	0	0	0	LLL nodule	VATs with wedge resection	5	0	0	2	4	0	2	1	3	0	2	1	4	1	0	1	0	0	0	1	5	1	12	0	1	1	0	0	1	0	0	0	0	0	0	0	1	0	1
36	1	42	18.8	2	HT	0	1	0	CA lung	VATs with lobectomy	5	0	0	2	3	0	1	1	3	0	2	1	2	0	1	1	0	0	0	1	5	1	7	0	1	1	1	0	1	0	0	0	0	0	0	0	0	0	0
37	1	70	23.2	2	HT, DLP	0	1	1	CA lung	VATs with RML lobectomy	7	0	0	2	6	0	0	1	2	0	1	1	1	0	0	1	1	0	0	1	5	1	5	0	0	1	0	0	1	0	0	0	0	0	0	0	0	0	0
38	1	63	21.3	3	HT, DLP	0	1	1	Thymoma	VATs with thymectomy	8	0	0	2	5	2	1	1	4	1	0	1	4	1	0	1	2	0	0	1	5	1	6	0	1	0	0	0	1	0	0	0	0	0	1	1	1	0	1
39	1	67	24.2	3	DM, DLP	1	0	1	CA lung	VATs with segmentectomy	7	0	0	2	4	2	0	1	4	0	0	1	3	0	0	1	2	0	0	1	5	4	3	0	0	0	0	0	1	0	0	0	0	0	1	0	0	0	1
40	1	31	18	1		0	0	0	RUL nodule	VATs with lobectomy	1	0	0	2	1	2	1	1	1	2	1	1	3	0	0	1	1	0	0	1	4	14	2	0	1	1	0	0	1	0	0	0	0	0	1	1	0	0	1
41	1	61	18	2	DLP	0	0	1	LU nodule	VATs with lobectomy	7	0	0	2	2	1	0	1	2	2	0	1	4	1	0	1	2	1	0	1	5	1	3	0	0	0	0	0	1	0	0	0	0	0	1	1	1	1	1
[truncated: 22 more columns]
